# Supplementary material
Source: PubMed Central journal article supplement (PMC9192121)
Supplement: mmc1.pdf [file mmc1.pdf]

*International Journal of Infectious Diseases*  
**AUTHORSHIP AGREEMENT**

For all submissions to International Journal of Infectious Diseases (THEIJID), request of authorship change during review process should be made to the Editorial Office of THEIJID. The form below should be completed for any authorship changes including adding new authors, removing existing authors, reordering existing authors, or adjusting equal contributor status of existing authors. Corresponding author should confirm that all authors meet the criteria for authorship as outlined by Committee on Publication Ethics (COPE) and that all authors agree to the change. All authors who have been added, removed, or reordered need to confirm that they agree to the change by signing the form. Please fill and return this form in time. The concerned submission will be put on hold for further processing until the editorial office receives the completed form.

**Manuscript number:** THEIJID-D-22-01091

**Manuscript title:** Benefits of plasma exchange on mortality in patients with COVID-19: a systematic review and meta-analysis

**Would you like to change the authorship of your paper?** (Please tick one of the following):

- No (No signature is needed if selected)
- Yes (please fill in box below with all necessary signatures):

**The nature of change(s) in authorship** (Please check one of the following):

- Change de Corresponding Author:
- Add new author(s);
- Remove existing author(s);
- Change the order of authorship;
- Others (please specify):

**Detailed reason for the change:**

The order of authors in the submission system was wrong when the manuscript was originally submitted, and this problem was found when the article was revised.  
I'm very sorry for this mistake.  
Thank you very much for your attention and help.  
Sincerely yours,  
Dong Han

**Indicate the specific change:**

**Adding a new author**

|                              |  |
|------------------------------|--|
| <b>Name</b>                  |  |
| <b>Email address</b>         |  |
| <b>Institution</b>           |  |
| <b>Specific contribution</b> |  |

**Removing an existing author**

|                      |  |
|----------------------|--|
| <b>Name</b>          |  |
| <b>Email address</b> |  |

|                          |  |
|--------------------------|--|
| Institution              |  |
| Agree to be acknowledged |  |

Complete author order AFTER change (please note any authors with equal contribution as first authors or corresponding authors)

| Order | Author name BEFORE change | Author name AFTER change | Signature   |
|-------|---------------------------|--------------------------|-------------|
| 1     | Dong Han                  | Jinlv Qin                | Jinlv Qin   |
| 2     | Jinlv Qin                 | Guizuo Wang              | Guizuo Wang |
| 3     | Guizuo Wang               | Dong Han                 | Dong Han    |
| 4     |                           |                          |             |
| 5     |                           |                          |             |
| 6     |                           |                          |             |
| 7     |                           |                          |             |
| 8     |                           |                          |             |
| 9     |                           |                          |             |
| 10    |                           |                          |             |

Approval of the final version of the manuscript to be submitted, all authors must sign the table above to indicate agreeing with the changed authorship (all authors must be listed, full name in print and signatures are needed from all).
